# Supplementary material for: Histological and serological features of acute liver injury after SARS-CoV-2 vaccination
Source: PubMed Central journal article supplement (PMC9691430; doi:10.1016/j.jhepr.2022.100605), 2022-10-13
Supplement: mmc1.pdf [file mmc1.pdf]

# Histological and serological features of acute liver injury after SARS-CoV-2 vaccination

Greta Codoni, Theresa Kirchner, Bastian Engel, Alejandra Maria Villamil, Cumali Efe,  
Albert Friedrich Stättermayer, Jan Philipp Weltzsch, Marcial Sebode, Christine  
Bernsmeier, Ana Lleo, Tom JG Gevers, Limas Kupčinskas, Agustin Castiella, Jose  
Pinazo, Eleonora De Martin, Ingrid Bobis, Thomas Damgaard Sandahl, Federica  
Pedica, Federica Invernizzi, Paolo Del Poggio, Tony Bruns, Mirjam Kolev, Nasser  
Semmo, Fernando Bessone , Baptiste Giguët , Guido Poggi, Masayuki Ueno, Helena  
Jang, Gülsüm Özlem Elpek, Neşe Karadağ Soylu, Andreas Cerny, Heiner  
Wedemeyer, Diego Vergani, Giorgina Mieli-Vergani, M. Isabel Lucena, Raul J  
Andrade, Yoh Zen, Richard Taubert, Benedetta Terziroli Beretta-Piccoli

## Table of contents

|               |   |
|---------------|---|
| Table S1..... | 2 |
| Table S2..... | 3 |
| Table S3..... | 4 |
| Table S4..... | 6 |

**Table S1: Co-mediations**

| <b>Co-mediations (n=59)</b>              | <b>n</b> |
|------------------------------------------|----------|
| <b>Yes</b>                               | 36 (61%) |
| <b>No</b>                                | 23 (39%) |
| Anti-hypertensive drugs                  | 21       |
| Anti-hyperlipidemic drugs                | 10       |
| Anti-diabetic drugs                      | 9        |
| Vitamins                                 | 8        |
| Aminosalicylates                         | 8        |
| Proton pump inhibitors                   | 7        |
| Diuretics                                | 7        |
| L-thyroxine                              | 5        |
| Non-steroidal anti-inflammatory drugs    | 4        |
| Anti-epileptic drugs                     | 4        |
| Monoclonal antibodies*                   | 3        |
| Herbal remedies                          | 3        |
| Selective serotonin re-uptake inhibitors | 2        |
| Anxiolitics/hypnotics                    | 2        |
| Anti-tumor drugs**                       | 2        |
| Azathioprine                             | 1        |
| Others                                   | 8        |

\* Denosumab (RANKL-inhibitor); Ocrelizumab (anti-CD20); Risankizumab (anti-IL23)

\*\* Letrozole, Ribociclib

**Table S2: Autoimmune extrahepatic co-morbidities**

| <b>Autoimmune co-morbidities (n=59)</b> | <b>n</b> |
|-----------------------------------------|----------|
| <b>Yes</b>                              | 18 (31%) |
| <b>No</b>                               | 41 (69%) |
| Autoimmune thyroid disease              | 6        |
| Psoriasis                               | 2        |
| Celiac disease                          | 3        |
| Sarcoidosis                             | 1        |
| Multiple sclerosis                      | 2        |
| Autoimmune hemolytic anemia             | 1        |
| Ulcerative colitis                      | 1        |
| Crohn's disease                         | 1        |
| Rheumatoid arthritis                    | 1        |
| Cushing syndrome                        | 1        |

**Table S3: Comparison of clinical features between cases with predominantly lobular and predominantly portal hepatitis**

|                                                                  | Lobular hepatitis<br>N=45 | Portal hepatitis<br>N=10 | p value | test           |
|------------------------------------------------------------------|---------------------------|--------------------------|---------|----------------|
| Female sex                                                       | 28 (62%)                  | 5 (50%)                  | 0.49    | Fisher's exact |
| Median age (years)                                               | 54                        | 59                       | 0.23    | Mann-Whitney U |
| Last vaccine before hepatitis: mRNA                              | 34 (75%)                  | 6 (60%)                  | 0.43    | Fisher's exact |
| Heterologous vaccination                                         | 6 (13%)                   | 1 (10%)                  | 1.00    | Fisher's exact |
| Hepatitis after first dose                                       | 19 (42%)                  | 2 (20%)                  | 0.30    | Fisher's exact |
| Hepatitis after second dose                                      | 25 (55%)                  | 7 (70%)                  | 0.49    | Fisher's exact |
| Hepatitis after third dose                                       | 1 (2%)                    | 1 (10%)                  | 0.33    | Fisher's exact |
| Time from last vaccine to hepatitis diagnosis, median (days)     | 24                        | 10                       | 0.06    | Mann-Whitney U |
| ALT at diagnosis, x ULN (median, U/l)                            | 26 (1002)                 | 15 (656)                 | 0.27    | Mann-Whitney U |
| AST at diagnosis, x ULN (median, U/l)                            | 28 (968)                  | 14 (469)                 | 0.02    | Mann-Whitney U |
| Alkaline phosphatase at diagnosis, x ULN (median, U/l)           | 171                       | 121 (n=9)                | 0.09    | Mann-Whitney U |
| Total bilirubin at diagnosis, x ULN (median, $\mu\text{mol/l}$ ) | 138                       | 29 (n=9)                 | 0.03    | Mann-Whitney U |
| Hepatocellular liver injury pattern                              | 43                        | 9 (n=9)                  | 1.00    | Fisher's exact |
| Mixed liver injury pattern                                       | 2                         | 0                        | n.a.    | Fisher's exact |
| Hy's criteria met                                                | 25                        | 4 (n=9)                  | 1.00    | Fisher's exact |
| New Hy's law met                                                 | 24                        | 4 (n=9)                  | 1.00    | Fisher's exact |
| No concomitant medication                                        | 19                        | 4                        | 1.00    | Fisher's exact |
| No medications for vaccine side effects                          | 16 (n=26)                 | 7 (n=7)                  | 0.07    | Fisher's exact |
| ANA positive                                                     | 35 (n=44)                 | 7 (n=9)                  | 1.00    | Fisher's exact |
| SMA positive                                                     | 18                        | 4 (n=7)                  | 0.43    | Fisher's exact |
| Anti-LKM positive                                                | 4 (n=38)                  | 0 (n=8)                  | 1.00    | Fisher's exact |
| AMA positive (1 borderline)                                      | 6 (n=40)                  | 0 (n=7)                  | 0.57    | Fisher's exact |
| IgG, g/l, (median)                                               | 16.9                      | 18.8                     | 0.78    | Mann-Whitney U |
| IgM, g/l (median)                                                | 1.21(n=37)                | 1.61 (n=8)               | 0.40    | Mann-Whitney U |
| Treatment                                                        | 41                        | 9                        | 1.00    | Fisher's exact |
| Normal ALT at 3 months                                           | 18 (n=42)                 | 3 (n=7)                  | 1.00    | Fisher's exact |

|                        |           |         |      |                |
|------------------------|-----------|---------|------|----------------|
| Normal ALT at 6 months | 22 (n=29) | 4 (n=7) | 0.37 | Fisher's exact |
|------------------------|-----------|---------|------|----------------|

ALT, alanine aminotransferase; AST, aspartate aminotransferase; IgG/M Immunoglobulin, G/M; ULN, upper limit of normal; SMA, anti-smooth muscle antibody; ANA, anti-nuclear antibody; LKM, liver kidney microsomal; AMA, anti-mitochondrial antibody; n.a. not applicable.

Numbers shown in paranthesis as "n= " represent the number of patients for whom the piece of data is available.

Table S4: Comparison of clinical features between cases with and without advanced liver fibrosis

| n=59                                 |                               | Ishak F0/1/2 (n=52) |    |                   | Ishak F ≥3 (n=7) |     |                   | p-value | test             |
|--------------------------------------|-------------------------------|---------------------|----|-------------------|------------------|-----|-------------------|---------|------------------|
|                                      |                               | n                   | %  | median (min; max) | n                | %   | median (min; max) |         |                  |
| <b>Sex</b>                           | male                          | 21                  | 40 |                   | 3                | 43  |                   | .901    | Chi <sup>2</sup> |
| <b>Age (years)</b>                   |                               |                     |    | 54 (19;78)        |                  |     | 60 (37;92)        | .327    | Mann-Whitney U   |
| <b>COVID-19 before liver injury</b>  | yes                           | 4                   | 8  |                   | 1                | 14  |                   | .557    | Chi <sup>2</sup> |
| <b>Vaccination</b>                   |                               |                     |    |                   |                  |     |                   |         |                  |
| <b>Heterologous vaccination</b>      | yes                           | 7                   | 14 |                   | 1                | 20  |                   | .732    | Chi <sup>2</sup> |
| <b>Last vaccine before hepatitis</b> | RNA                           | 35                  | 67 |                   | 7                | 100 |                   | .200    | Chi <sup>2</sup> |
|                                      | vector                        | 16                  | 31 |                   | 0                | 0   |                   |         |                  |
|                                      | inactivated                   | 1                   | 2  |                   | 0                | 0   |                   |         |                  |
| <b>Vaccine before hepatitis</b>      | mRNA-1273 (Moderna)           | 10                  | 19 |                   | 2                | 29  |                   | .523    | Chi <sup>2</sup> |
|                                      | BNT162b2 (Pfizer)             | 25                  | 48 |                   | 5                | 71  |                   |         |                  |
|                                      | AZD1222 (Astra)               | 11                  | 21 |                   | 0                | 0   |                   |         |                  |
|                                      | Ad26.COV2.S (Johnson&Johnson) | 0                   | 0  |                   | 0                | 0   |                   |         |                  |
|                                      | Gam-COVID-Vac (Sputnik V)     | 5                   | 10 |                   | 0                | 0   |                   |         |                  |
|                                      | BBIBP-CorV (Sinopharm)        | 1                   | 2  |                   | 0                | 0   |                   |         |                  |

|                                             |                          |    |    |           |  |   |            |      |                  |
|---------------------------------------------|--------------------------|----|----|-----------|--|---|------------|------|------------------|
| <b>Vaccine to hepatitis (days)</b>          |                          |    |    | 24 (1;74) |  |   | 19 (1; 48) | .573 | Mann-Whitney U   |
| <b>Hepatitis post vacc 1 vs 2/3</b>         | post 1st vaccination     | 18 | 35 |           |  | 2 | 29         | .751 | Chi <sup>2</sup> |
|                                             | post 2nd/3rd vaccination | 34 | 65 |           |  | 7 | 71         |      |                  |
| <b>Vaccination after hepatitis</b>          | no                       | 37 | 71 |           |  | 7 | 100        | .100 | Chi <sup>2</sup> |
|                                             | yes                      | 15 | 29 |           |  | 0 | 0          |      |                  |
| <b>Vaccine post hepatitis</b>               | mRNA                     | 8  | 53 |           |  | 0 | 0          |      |                  |
|                                             | vector                   | 6  | 40 |           |  | 0 | 0          |      |                  |
|                                             | protein-based            | 1  | 78 |           |  | 0 | 0          |      |                  |
| <b>Medications for vaccine side effects</b> | no                       | 26 | 50 |           |  | 6 | 86         | .094 | Chi <sup>2</sup> |
|                                             | yes                      | 4  | 8  |           |  | 1 | 14         |      |                  |
|                                             | unknown                  | 22 | 42 |           |  | 0 | 0          |      |                  |
| <b>Autoimmune comorbidities</b>             | no                       | 30 | 58 |           |  | 6 | 86         | .341 | Chi <sup>2</sup> |
|                                             | yes                      | 17 | 33 |           |  | 1 | 14         |      |                  |
|                                             | unknown                  | 5  | 10 |           |  | 0 | 0          |      |                  |
| <b>AIH simplified diagnostic score</b>      |                          |    |    | 6 (3; 8)  |  |   | 7 (3;9)    | .497 | Mann-Whitney U   |
| <b>Biopsy scan</b>                          |                          |    |    |           |  |   |            |      |                  |
| <b>Interface</b>                            |                          |    |    | 1 (0; 4)  |  |   | 3 (1; 4)   | .017 | Mann-Whitney U   |
| <b>Confluent</b>                            |                          |    |    | 2 (0; 6)  |  |   | 1 (0; 5)   | .441 | Mann-Whitney U   |

|                                         |                           |    |    |           |   |     |            |      |                  |
|-----------------------------------------|---------------------------|----|----|-----------|---|-----|------------|------|------------------|
| <b>Lobular</b>                          |                           |    |    | 3 (0; 4)  |   |     | 2 (2; 3)   | .483 | Mann-Whitney U   |
| <b>Portal</b>                           |                           |    |    | 2 (0; 3)  |   |     | 2 (2; 3)   | .049 | Mann-Whitney U   |
| <b>Ishak</b>                            |                           |    |    | 9 (0; 14) |   |     | 10 (6; 11) | .757 | Mann-Whitney U   |
| <b>Simplified AIH</b>                   | typical                   | 9  | 17 |           | 5 | 71  |            | .006 | Chi <sup>2</sup> |
|                                         | compatible                | 32 | 62 |           | 2 | 29  |            |      |                  |
|                                         | atypical                  | 11 | 21 |           | 0 | 0   |            |      |                  |
| <b>New histological criteria</b>        | likely                    | 34 | 65 |           | 7 | 100 |            | .175 | Chi <sup>2</sup> |
|                                         | possible                  | 13 | 25 |           | 0 | 0   |            |      |                  |
|                                         | unlikely                  | 5  | 10 |           | 0 | 0   |            |      |                  |
| <b>Predominant histology</b>            | lobular                   | 42 | 81 |           | 3 | 43  |            | .010 | Chi <sup>2</sup> |
|                                         | portal                    | 6  | 12 |           | 4 | 57  |            |      |                  |
|                                         | others                    | 4  | 8  |           | 0 | 0   |            |      |                  |
| <b>Predominant histology - subtype</b>  | confluent necrosis        | 30 | 58 |           | 3 | 43  |            | .180 | Chi <sup>2</sup> |
|                                         | panlobular                | 7  | 13 |           | 0 | 0   |            |      |                  |
|                                         | >mild interface hepatitis | 4  | 8  |           | 3 | 43  |            |      |                  |
|                                         | bland cholestasis         | 2  | 4  |           | 0 | 0   |            |      |                  |
|                                         | mild interface hepatitis  | 2  | 4  |           | 1 | 14  |            |      |                  |
|                                         | central perivenulitis     | 5  | 10 |           | 0 | 0   |            |      |                  |
|                                         | minor change              | 1  | 2  |           | 0 | 0   |            |      |                  |
|                                         | steatohepatitis           | 1  | 2  |           | 0 | 0   |            |      |                  |
| <b>Centralized autoantibody testing</b> |                           |    |    |           |   |     |            |      |                  |



|                                         |                                   |       |    |  |     |     |  |      |                  |
|-----------------------------------------|-----------------------------------|-------|----|--|-----|-----|--|------|------------------|
| <b>centralized autoantibody testing</b> | yes                               | 28    | 54 |  | 3   | 43  |  | .585 | Chi <sup>2</sup> |
| <b>ANA</b>                              | present                           | 21/28 | 75 |  | 2/3 | 67  |  | .754 | Chi <sup>2</sup> |
| <b>ANA titer</b>                        | 80                                | 4     | 19 |  | 0   | 0   |  | .182 | Chi <sup>2</sup> |
|                                         | 160                               | 10    | 48 |  | 0   | 0   |  |      |                  |
|                                         | >160                              | 7     | 33 |  | 2   | 100 |  |      |                  |
| <b>AMA</b>                              | positivity                        | 4/28  | 14 |  | 0/3 | 0   |  | .483 | Chi <sup>2</sup> |
| <b>AMA titer</b>                        | 160                               | 3     | 75 |  | 0   | 0   |  |      |                  |
|                                         | >160                              | 1     | 25 |  | 0   | 0   |  |      |                  |
| <b>SMA</b>                              | positivity                        | 19/28 | 68 |  | 1/3 | 33  |  | .235 | Chi <sup>2</sup> |
| <b>SMA titer</b>                        | 80                                | 9     | 47 |  | 0   | 0   |  | .009 | Chi <sup>2</sup> |
|                                         | 160                               | 9     | 47 |  | 0   | 0   |  |      |                  |
|                                         | >160                              | 1     | 5  |  | 1   | 100 |  |      |                  |
| <b>SMA pattern</b>                      | V                                 | 11    | 58 |  | 0   | 0   |  | .000 | Chi <sup>2</sup> |
|                                         | VGT                               | 7     | 37 |  | 0   | 0   |  |      |                  |
|                                         | G                                 | 1     | 5  |  | 0   | 0   |  |      |                  |
|                                         | GT                                | 0     | 0  |  | 1   | 100 |  |      |                  |
| <b>LKM</b>                              | positivity                        | 4/28  | 14 |  | 0/3 | 0   |  | .483 | Chi <sup>2</sup> |
| <b>LKM titer</b>                        | 80                                | 1     | 25 |  | 0   | 0   |  |      |                  |
|                                         | 160                               | 3     | 75 |  | 0   | 0   |  |      |                  |
| <b>Western blot</b>                     | negative for LKM1, LKM2, LKM3     | 4     | 80 |  | 0   | 0   |  |      |                  |
|                                         | borderline for PDH-E2 and BCKD-E2 | 1     | 20 |  | 0   | 0   |  |      |                  |
| <b>Others</b>                           | positivity                        | 9/27  | 33 |  | 0/0 | 0   |  |      |                  |
| <b>Other type</b>                       | PCA                               | 7     | 78 |  | 0   | 0   |  |      |                  |
|                                         | ARA                               | 1     | 11 |  | 0   | 0   |  |      |                  |
|                                         | PCAl like                         | 1     | 11 |  | 0   | 0   |  |      |                  |

|                                   |                |       |    |                |     |     |                |      |                  |
|-----------------------------------|----------------|-------|----|----------------|-----|-----|----------------|------|------------------|
| Other titer                       | 80             | 2     | 22 |                | 0   | 0   |                |      |                  |
|                                   | 160            | 6     | 67 |                | 0   | 0   |                |      |                  |
|                                   | >160           | 1     | 11 |                | 0   | 0   |                |      |                  |
| Hep2 ANA                          | positivity     | 25/28 | 89 |                | 2/3 | 66  |                | .232 | Chi <sup>2</sup> |
| Hep2 ANA titer                    | 40             | 0     | 0  |                | 0   | 0   |                | .023 | Chi <sup>2</sup> |
|                                   | 80             | 6     | 24 |                | 0   | 0   |                |      |                  |
|                                   | 160            | 15    | 60 |                | 0   | 0   |                |      |                  |
|                                   | >160           | 4     | 16 |                | 2   | 100 |                |      |                  |
| Hep2 ANA pattern*                 | homogen        | 5     | 20 |                | 1   | 33  |                | .860 | Chi <sup>2</sup> |
|                                   | fine speckled  | 17    | 68 |                | 2   | 67  |                |      |                  |
|                                   | nucleolar      | 5     | 20 |                | 0   | 0   |                |      |                  |
|                                   | centromere     | 1     | 4  |                | 0   | 0   |                |      |                  |
| Hep2 SMA, AMA                     | SMA            | 13    | 76 |                | 1   | 100 |                | .839 | Chi <sup>2</sup> |
|                                   | AMA            | 2     | 12 |                | 0   | 0   |                |      |                  |
|                                   | AMA-like       | 2     | 12 |                | 0   | 0   |                |      |                  |
| Hep2 SMA, AMA (titer)             | 80             | 6     | 43 |                | 0   | 0   |                |      |                  |
|                                   | 160            | 6     | 43 |                | 0   | 0   |                |      |                  |
|                                   | >160           | 2     | 14 |                | 0   | 0   |                |      |                  |
| Liver LIA                         | positivity     | 5/28  | 18 |                | 0/2 | 0   |                | .513 | Chi <sup>2</sup> |
| Liver LIA                         | LKM1           | 1     | 20 |                | 0   | 0   |                |      |                  |
|                                   | AMA M2         | 4     | 80 |                | 0   | 0   |                |      |                  |
| Gastro LIA                        | PCA borderline | 1     | 25 |                | 0   | 0   |                |      |                  |
|                                   | PCA            | 3     | 75 |                | 0   | 0   |                |      |                  |
| pIgG (normalized arbitrary units) |                |       |    | 1.2 (0.4; 2.7) |     |     | 1.2 (0.4; 1.4) | .391 | Mann-Whitney U   |
| pIgG (cut-off 1,27)               | negative       | 13    | 52 |                | 2   | 67  |                | .630 | Chi <sup>2</sup> |
|                                   | positive       | 12    | 48 |                | 1   | 33  |                |      |                  |
| <b>Treatment</b>                  |                |       |    |                |     |     |                |      |                  |

|                                                                  |                   |    |     |                   |   |     |             |                |                  |
|------------------------------------------------------------------|-------------------|----|-----|-------------------|---|-----|-------------|----------------|------------------|
| <b>Treatment</b>                                                 | no                | 6  | 12  |                   | 1 | 14  |             | .833           | Chi <sup>2</sup> |
|                                                                  | yes               | 46 | 88  |                   | 6 | 86  |             |                |                  |
| <b>Steroids for initial therapy</b>                              | no                | 0  | 0   |                   | 0 | 0   |             | 1              | Chi <sup>2</sup> |
|                                                                  | yes               | 46 | 100 |                   | 6 | 100 |             |                |                  |
| <b>Doses Steroids for initial therapy, prednisolone (mg/day)</b> |                   |    |     | 50 (10; 625)      |   |     | 45 (30; 50) | .277           | Mann-Whitney U   |
| <b>Azathioprine therapy</b>                                      | no                | 40 | 87  |                   | 6 | 100 |             | .347           | Chi <sup>2</sup> |
|                                                                  | yes               | 6  | 13  |                   | 0 | 0   |             |                |                  |
| <b>Azathioprine dose (mg/d)</b>                                  |                   |    |     | 50 (25; 150)      |   |     |             |                |                  |
| <b>Liver values</b>                                              |                   |    |     |                   |   |     |             |                |                  |
| <b>diagnosis</b>                                                 | <b>n=52</b>       |    |     | <b>n=7</b>        |   |     |             |                |                  |
| <b>ALT/ULN</b>                                                   | 24.5 (3.9; 111.3) |    |     | 19.7 (11.6; 52.5) |   |     | .845        | Mann-Whitney U |                  |
| <b>AST/ULN</b>                                                   | 22.1 (3.0; 169.1) |    |     | 18.6 (9.7; 42.3)  |   |     | .829        | Mann-Whitney U |                  |
| <b>ALP/ULN</b>                                                   | 1.4 (0.5; 8.2)    |    |     | 1.0 (0.8; 2.9)    |   |     | .657        | Mann-Whitney U |                  |
| <b>GGT/ULN</b>                                                   | 4.3 (0.4; 38.0)   |    |     | 3.7 (1.1; 9.4)    |   |     | .683        | Mann-Whitney U |                  |
| <b>Total bilirubin/ULN</b>                                       | 5.7 (0.4; 34.4)   |    |     | 2.7 (0.8; 24.7)   |   |     | .680        | Mann-Whitney U |                  |

|                             |                                                                   |    |    |                  |   |     |                  |      |                  |
|-----------------------------|-------------------------------------------------------------------|----|----|------------------|---|-----|------------------|------|------------------|
| <b>INR</b>                  |                                                                   |    |    | 1.2 (0.7; 3.2)   |   |     | 1.2 (1.0; 2.2)   | .543 | Mann-Whitney U   |
| <b>IgG (g/l)</b>            |                                                                   |    |    | 16.8 (6.6; 34.7) |   |     | 21.7 (8.7; 39.9) | .036 | Mann-Whitney U   |
| <b>IgM (g/l)</b>            |                                                                   |    |    | 1.2 (0.2; 5.3)   |   |     | 1.2 (0.9; 9.8)   | .616 | Mann-Whitney U   |
| <b>original Hy's law</b>    | yes                                                               | 29 | 59 |                  | 3 | 43  |                  | .414 | Chi <sup>2</sup> |
|                             | no                                                                | 20 | 41 |                  | 4 | 57  |                  |      |                  |
| <b>new Hy's law</b>         | yes                                                               | 26 | 53 |                  | 4 | 57  |                  | .839 | Chi <sup>2</sup> |
|                             | no                                                                | 23 | 47 |                  | 3 | 43  |                  |      |                  |
| <b>R</b>                    |                                                                   |    |    | 16.8 (2.3; 92.0) |   |     | 16.5 (8.8; 28.2) | .981 | Mann-Whitney U   |
| <b>Liver injury pattern</b> | hepatocellular (R≥5)                                              | 48 | 94 |                  | 7 | 100 |                  | .510 | Chi <sup>2</sup> |
|                             | mixed (R 2-5)                                                     | 3  | 6  |                  | 0 | 0   |                  |      |                  |
| <b>Outcome</b>              |                                                                   |    |    |                  |   |     |                  |      |                  |
| <b>Outcome</b>              | spontaneous remission                                             | 4  | 8  |                  | 1 | 14  |                  | .158 | Chi <sup>2</sup> |
|                             | remission under immunosuppression (IS) & successful IS withdrawal | 8  | 15 |                  | 1 | 14  |                  |      |                  |
|                             | remission under IS & IS withdrawal is still ongoing               | 23 | 44 |                  | 1 | 14  |                  |      |                  |

|                                                           |    |    |   |    |  |  |
|-----------------------------------------------------------|----|----|---|----|--|--|
| remission & IS withdrawal failure                         | 2  | 4  | 2 | 29 |  |  |
| improvement no remission despite treatment                | 11 | 21 | 1 | 14 |  |  |
| transplantation or liver related death                    | 1  | 2  | 0 | 0  |  |  |
| death, non liver related                                  | 1  | 2  | 1 | 14 |  |  |
| relapse treated with steroids after spontaneous remission | 2  | 4  | 0 | 0  |  |  |

\* multiple answers possible, \*\* AST is missing for some patients

Abbreviations: SARS-CoV-2 Severe Acute Respiratory Coronavirus 2, COVID-19 Coronavirus disease 2019, AIH Autoimmune Hepatitis, IgG/M Immunoglobuline G/M, ULN Upper limit of normal, ALT Alanine aminotransferase, INR International Normalized Ratio, AST Aspartate aminotransferase, SMA Anti-smooth cell antibody, ALP Alkaline phosphatase, ANA Anti-nuclear antibody, LKM Liver kidney microsomal, AMA Anti-mitochondrial antibody, SLA Soluble liver antigen, PIgG Polyreactive immunoglobulin G, PCA Parietal cell antibody, IS Immunosuppression. R value: ALT/ULN divided by ALP/ULN.
